# Supplementary material for: Deficiency of orexin receptor type 1 in dopaminergic neurons increases novelty-induced locomotion and exploration
Source: eLife. 2025 Jan 22;12:RP91716. doi: 10.7554/eLife.91716 (PMC11753781; doi:10.7554/eLife.91716)
Supplement: Supplementary file 1. [file elife-91716-supp1.xlsx]

## Sheet: functions of brain regions
	Brain regions	Functions	References
	piriform cortex, endopiriform claustrum, nucleus of the horizontal limb of the diagonal band, magnocellular preoptic nucleus	olfactory sensation	Smith et al., 2019; Wilson & Sullivan, 2011; Nunez-Parra et al., 2013
	spinal trigeminal nucleus and spinal trigeminal tract	pain and temperature sensation of oral cavity and the surface of face	Erzurumlu et al., 2010; Patel et al., 2022
	intermediate reticular zone	mastication	Nakamura et al., 2017; Travers et al., 2005
	gigantocellular reticular nucleus	motion related to arousal and motivation	Lemieux & Bretzner, 2019; Martin et al., 2011
	ventral part of subcoeruleus nucleus	sleeping	Hogl et al., 2018
	bed nucleus of the stria terminalis	emotion	Giardino et al., 2018
	lateral paragigantocellular nucleus	exploratory behaviours, locomotor speed	Takatoh et al., 2013; Arber & Costa, 2022; Capelli et al., 2017
	secondary motor cortex	action selection	Olson et al., 2020; Sul et al., 2011
